# Supplementary material
Source: PubMed Central journal article supplement (PMC6739230)
Supplement: EMS82751-supplement-Supplementary_Tables.pdf [file EMS82751-supplement-Supplementary_Tables.pdf]

## Supplementary Tables

**Supplementary Table 1:** Thresholds for the social anxiety example for each contrast on the standardised mean difference (SMD) scale, sorted to show contrasts with smallest thresholds first. Only contrasts with SMD less than 2 are shown here; the full set can be obtained by running the R code provided in the supplementary material. NT = no threshold in this direction.

| Contrast |     |    | Thresholds and new optimal treatments |        |        |    |
|----------|-----|----|---------------------------------------|--------|--------|----|
|          |     |    | Lower                                 | Upper  |        |    |
| 41       | vs. | 31 | -                                     | NT     | 0.46   | 36 |
| 41       | vs. | 23 | -                                     | NT     | 0.47   | 36 |
| 36       | vs. | 1  | 36                                    | -0.48  | 15.17  | 7  |
| 36       | vs. | 16 | 36                                    | -0.57  | 5.60   | 16 |
| 36       | vs. | 24 | 36                                    | -0.69  | 6.34   | 25 |
| 41       | vs. | 2  | -                                     | NT     | 0.83   | 36 |
| 17       | vs. | 2  | 17                                    | -0.86  | 51.18  | 12 |
| 13       | vs. | 2  | 13                                    | -0.89  | 140.10 | 4  |
| 39       | vs. | 18 | 39                                    | -0.94  | 3.96   | 36 |
| 38       | vs. | 21 | 38                                    | -0.95  | 3.92   | 36 |
| 18       | vs. | 2  | 39                                    | -0.96  | 9.32   | 36 |
| 23       | vs. | 2  | 23                                    | -1.88  | 0.98   | 36 |
| 36       | vs. | 2  | 36                                    | -1.02  | 35.15  | 18 |
| 16       | vs. | 2  | 36                                    | -1.03  | 17.80  | 12 |
| 19       | vs. | 2  | 19                                    | -1.06  | 30.23  | 23 |
| 25       | vs. | 24 | 25                                    | -1.11  | 554.79 | 39 |
| 31       | vs. | 8  | 31                                    | -13.74 | 1.15   | 36 |
| 34       | vs. | 1  | 34                                    | -1.19  | 102.31 | 5  |
| 31       | vs. | 1  | 31                                    | -15.58 | 1.20   | 36 |
| 32       | vs. | 30 | 32                                    | -1.33  | 5.90   | 36 |
| 11       | vs. | 2  | 11                                    | -1.42  | 856.47 | 34 |
| 9        | vs. | 2  | 9                                     | -1.43  | 46.88  | 36 |
| 40       | vs. | 35 | 40                                    | -1.48  | 3.17   | 36 |
| 30       | vs. | 24 | 30                                    | -8.78  | 1.49   | 36 |
| 15       | vs. | 2  | 15                                    | -1.52  | 49.81  | 23 |
| 22       | vs. | 2  | 22                                    | -1.54  | 6.18   | 18 |
| 8        | vs. | 1  | 8                                     | -1.98  | 1.55   | 36 |
| 8        | vs. | 6  | 8                                     | -13.19 | 1.57   | 6  |
| 37       | vs. | 30 | 37                                    | -1.74  | 7.20   | 36 |
| 8        | vs. | 7  | 8                                     | -17.10 | 1.75   | 7  |
| 31       | vs. | 23 | 36                                    | -1.79  | 2.11   | 23 |
| 21       | vs. | 2  | 21                                    | -1.80  | 11.17  | 36 |
| 12       | vs. | 2  | 12                                    | -1.97  | 59.88  | 36 |

**Supplementary Table 2:** Contrast level thresholds for the headaches example, in headache days per month. NT = no threshold in this direction.

| Contrast | Thresholds and new optimal treatments |       |       |            |  |
|----------|---------------------------------------|-------|-------|------------|--|
|          |                                       | Lower | Upper |            |  |
| 2 vs. 1  | 2, 3, 6, 7                            | -0.17 | NT    | -          |  |
| 4 vs. 1  | 3, 4, 6, 7                            | -0.82 | 11.89 | 3, 6, 7, 8 |  |
| 5 vs. 1  | 3, 5, 6, 7                            | -0.68 | 24.05 | 2, 3, 6, 7 |  |
| 6 vs. 1  | -                                     | NT    | 0.14  | 3, 6, 7, 8 |  |
| 7 vs. 1  | 3, 7                                  | -1.05 | 0.64  | 3, 6, 7, 8 |  |
| 8 vs. 1  | 3, 6, 7, 8                            | -0.09 | NT    | -          |  |
| 6 vs. 3  | 6, 7                                  | -0.45 | 0.40  | 3, 7       |  |
| 7 vs. 6  | 3, 7                                  | -0.52 | 1.12  | 3, 6       |  |

**Supplementary Table 3:** Study level thresholds for the headaches example, in headache days per month.  
 NT = no threshold in this direction.

| Study                      | Thresholds and new optimal treatments |        |       |            |
|----------------------------|---------------------------------------|--------|-------|------------|
|                            |                                       | Lower  | Upper |            |
| Diener 2009 (1)            | -                                     | NT     | 0.17  | 2, 3, 6, 7 |
| Diener 2009 (2)            | 2, 3, 6, 7                            | -0.17  | NT    | -          |
| Apostol 2008 (1)           | 3, 6, 7, 8                            | -7.15  | 0.82  | 3, 4, 6, 7 |
| Apostol 2008 (4)           | 3, 4, 6, 7                            | -2.99  | 5.01  | 3, 6, 7, 8 |
| Apostol 2008 (4)           | 3, 4, 6, 7                            | -2.45  | NT    | -          |
| Apostol 2008 (4)           | 3, 4, 6, 7                            | -2.08  | 7.99  | 3, 6, 7, 8 |
| Brandes 2004 (1)           | 3, 6, 7, 8                            | -0.65  | NT    | -          |
| Brandes 2004 (6)           | -                                     | NT     | 1.47  | 3, 6, 7, 8 |
| Brandes 2004 (6)           | -                                     | NT     | 1.79  | 3, 6, 7, 8 |
| Brandes 2004 (6)           | -                                     | NT     | 17.46 | 2, 3, 6, 7 |
| Lewis 2009 (1)             | 3, 6, 7, 8                            | -1.50  | NT    | -          |
| Lewis 2009 (6)             | -                                     | NT     | 2.28  | 3, 6, 7, 8 |
| Lewis 2009 (6)             | -                                     | NT     | 3.51  | 3, 6, 7, 8 |
| Lipton 2011 (1)            | 3, 6, 7, 8                            | -0.92  | NT    | -          |
| Lipton 2011 (6)            | -                                     | NT     | 0.75  | 3, 6, 7, 8 |
| Silberstein 2004 (1)       | 3, 6, 7, 8                            | -0.54  | NT    | -          |
| Silberstein 2004 (6)       | -                                     | NT     | 1.83  | 3, 6, 7, 8 |
| Silberstein 2004 (6)       | -                                     | NT     | 1.74  | 3, 6, 7, 8 |
| Silberstein 2004 (6)       | -                                     | NT     | 1.65  | 3, 6, 7, 8 |
| Winner 2005 (1)            | 3, 6, 7, 8                            | -1.49  | NT    | -          |
| Winner 2005 (6)            | -                                     | NT     | 1.27  | 3, 6, 7, 8 |
| Diener 2004 (1)            | 3, 6, 7, 8                            | -0.19  | 1.32  | 3, 7       |
| Diener 2004 (6)            | 3, 6                                  | -2.48  | 0.98  | 3, 7       |
| Diener 2004 (6)            | 3, 6                                  | -2.78  | 0.95  | 3, 7       |
| Diener 2004 (7)            | 3, 7                                  | -0.35  | 0.69  | 3, 6       |
| Holroyd 2010 (1)           | 6, 7                                  | -14.13 | 0.09  | 3, 6, 7, 8 |
| Holroyd 2010 (8)           | 3, 6, 7, 8                            | -0.09  | 14.67 | 6, 7       |
| Silberstein 2013 (5 vs. 1) | 3, 5, 6, 7                            | -0.69  | 11.76 | 2, 3, 6, 7 |
| Dodick 2009 (3 vs. 6)      | 3, 7                                  | -0.39  | 0.44  | 6, 7       |
